# Supplementary material for: Experience-dependent plasticity in an innate social behavior is mediated by hypothalamic LTP
Source: PubMed Central journal article supplement — Proc Natl Acad Sci U S A. 2020 Sep 24;117(41):25789–99. doi: 10.1073/pnas.2011782117 (PMC7568289; doi:10.1073/pnas.2011782117), 2020-09-24
Supplement: pnas.2011782117.sapp.pdf [file pnas.2011782117.sapp.pdf]

1

2 Supplementary Information for

3 **Experience-dependent plasticity in an innate social behavior is mediated by**  
4 **hypothalamic LTP**

5 *Stefanos Stagkourakis<sup>1\*</sup>, Giada Spigolon<sup>2</sup>, Grace Liu<sup>1</sup>, David J. Anderson<sup>1,3\*</sup>*

6

7 **\*Corresponding author information:** Stefanos Stagkourakis, David J. Anderson

8 **Email:** [stefanos.stagkourakis@caltech.edu](mailto:stefanos.stagkourakis@caltech.edu), [wuwei@caltech.edu](mailto:wuwei@caltech.edu)

9

10

11

12 **This PDF file includes:**

13 Supplementary Information text

14 Figures S1 to S5 with legends

15 Table S1

16 SI References

## 17 **Supplementary Information Text**

### 18 **Extended Discussion**

19           The plasticity observed at AHIPM→VMHvI<sup>Esr1</sup> synapses likely has both post- and pre-synaptic  
20 components, as suggested by an increase in the AMPAR/NMDAR ratio (1-3) following aggression  
21 training (Fig. 2J, K), and by the differential responses of VMHvI<sup>Esr1</sup> neurons to trains of pre-synaptic stimuli  
22 (4, 5) (Fig. 2L, M), respectively. Surprisingly, the form of hypothalamic LTP studied here does not exhibit  
23 “occlusion,” phenomenon observed in studies of hippocampal or amygdalar LTP (6, 7), in which following  
24 *in vivo* behavioral induction of LTP in the synaptic population of interest, the magnitude of LTP that can  
25 be induced subsequently *ex vivo* is markedly decreased (Fig. 4D, K). Similarly, we do not observe the  
26 related phenomenon in which prior *in vivo* LTP can enhance the extent of LTD that can be induced *ex*  
27 *vivo* in slices from such animals. The reason(s) for the failure to observe these phenomena are not clear,  
28 and will require further studies to elucidate. There are a number of effects, however, which could account  
29 for these observations. Firstly, it is possible that the proportion of synapses modified by the *in vivo* social  
30 experience was small compared to the synapses being sampled in the slice. Another possibility is that  
31 the synapses being assayed in the slice are a different population than the ones modified *in vivo*, or lastly  
32 that new synapses were formed by the *in vivo* experience and they are the ones primarily contributing to  
33 the LTP and LTD being measured *in vitro*. This last possibility is of particular interest, given that - as  
34 presented in Fig. 3, an increase in spine density occurs in VMHvI<sup>Esr1</sup> neurons of AGG mice.

35           The data on LTP presented here, blur the distinction between neural circuits mediating learned  
36 vs. innate behaviors, and reinforce the concept of “learned innate behavior,” in which plasticity within  
37 developmentally hardwired circuits can function to modify the strength of an instinctive behavior in  
38 response to social experience (8, 9). An example of the latter in an invertebrate is the post-mating  
39 response in *Drosophila*, a form of memory in which female sexual receptivity is inhibited following mating  
40 (10-12).

41 This idea notwithstanding, more complex forms of learning, such as classical or operant  
42 conditioning, may utilize circuits that are parallel to those that mediate innate forms of the modified  
43 behavior, as shown in the case of conditioned vs. innate fear (13-15). In this context, it is worth noting  
44 that mice can learn an instrumental, operant response using successful aggressive encounters as a  
45 reinforcer (16), and that performance of this instrumental task is facilitated by optogenetic activation of  
46 VMHvl neurons (17). The neural substrates and synaptic mechanisms underlying this operant  
47 conditioning remain to be elucidated, although the nucleus accumbens-based reward system has been  
48 implicated in recent studies (18).

49 Aggressiveness can be enhanced not only by repeated successful agonistic encounters, as  
50 shown here, but also by prior mating experience (19). Recently, we showed that as little as 30 minutes  
51 of free social interaction with a female was sufficient to transform a socially naive mouse into an AGG  
52 mouse within 24 hrs of the interaction (8). This effect was associated with a change in the neural  
53 representation of male vs. female conspecifics among VMHvl<sup>Esr1</sup> neurons, from partially overlapping to  
54 largely non-overlapping (8). Whether this change in neural population coding involves synaptic plasticity  
55 within VMHvl, or is inherited from upstream structures, such as the MeA (9), remains to be determined.  
56 In other studies, we have shown that the effect of social isolation stress to promote aggression in non-  
57 sexually experienced males is mediated by the neuropeptide Neurokinin B (NkB) and its receptor Nk3R,  
58 acting in the dorso-medial hypothalamus (DMH) (20). The relationship of this form of experience-  
59 dependent plasticity to VMHvl<sup>Esr1</sup> neuronal activity is currently unknown.

60 Our current findings also provide insights into individual differences in the ability of genetically  
61 identical animals to respond to “aggression training”. Firstly, we show here that several physiological  
62 parameters in AGG mice are different from those in socially naïve mice. These include elevated baseline  
63 VMHvl<sup>Esr1</sup> neuron activity (Fig. 1G-J), increased spontaneous excitatory input onto VMHvl<sup>Esr1</sup> neurons  
64 (Fig. 2A-C), increased AMPA/NMDA ratio at AHiPM→VMHvl<sup>Esr1</sup> synapses (Fig. 2I-K) and altered synaptic  
65 integration properties (Fig. L, M). By contrast, in NON mice the spontaneous inhibitory inputs to VMHvl<sup>Esr1</sup>

66 neurons are increased, relative to socially naïve mice (Fig. S1). In addition, NON mice exhibit shorter  
67 lasting LTP and longer lasting LTD than are observed in AGG mice (Fig. 4D, G). Whether increased LTD  
68 is sufficient to account for the failure of NON mice to respond to aggression training is not yet clear.  
69 Another possibility, suggested by the increased spontaneous IPSCs, is that VMHvl receives stronger  
70 inhibitory input from GABAergic neurons in NON mice. While there are very few GABAergic neurons  
71 within VMHvl itself (21), VMHvl receives strong inhibitory input from the neighboring tuberal (TU) region.  
72 It is possible that the lack of aggression in NON mice reflects potentiation of these TU GABAergic  
73 neurons. The synaptic mechanisms responsible for the lack of aggression in NON mice will clearly require  
74 further investigation.

75 We also find that NON mice have lower levels of circulating T in comparison to AGG mice, and  
76 that experimental administration of supplemental T can restore the capacity for “aggression learning” in  
77 such animals. While the role of T in promoting male aggressiveness is well-established (22-27), our  
78 studies provide new insight into the neurophysiological mechanisms that may mediate this effect in the  
79 context of aggression training. Specifically, we observe that NON animals can only express LTP *in vivo*  
80 following administration of exogenous T. Although LTP can be induced optogenetically *ex vivo* in slices  
81 from control NON animals, LTP in slices from T-implanted NON animals exhibited higher-amplitude and  
82 persistence. Moreover, in AGG mice, levels of T increased during aggression training. This correlation  
83 suggests either that T acts directly to enhance LTP at this synapse, which in turn promotes aggression,  
84 or that T acts indirectly, by promoting aggressive behavior which in turn enhances LTP (Fig. S5). Whether  
85 T directly influences synaptic plasticity, and if so the underlying molecular mechanisms involved, as well  
86 as the mechanistic basis of individual differences in T levels, are interesting topics for future study.

87 Our experiments have focused on a specific glutamatergic input to VMHvl<sup>Esr1</sup> neurons which have  
88 a causal role in aggression. In addition to our findings, recent work reported that VMHvl-projecting Vglut<sup>+</sup>  
89 neurons in the AHIPM are active during both social investigation and attack, and that functional  
90 manipulation of these neurons influences attack (28, 29). VMHvl<sup>Esr1</sup> neurons receive inputs from neurons

91 in over 30 different structures (30), raising the question of whether other glutamatergic inputs to these  
92 cells also display plasticity. Indeed, recently published work has identified synaptic plasticity promoted  
93 by foot-shock stress in a medial amygdala projection that primarily targets the central part of VMH (VMHc)  
94 (31). Although a causal role in promoting aggression was not directly demonstrated for this input, and the  
95 mechanism of potentiation was not established, plasticity at this synapse may regulate stress-induced  
96 aggression (31). The present study demonstrates that AHiPM→ VMHvI<sup>Esr1</sup> synapses can undergo  
97 Hebbian LTP, and that potentiation of these synapses occurs during social experience that enhances  
98 offensive aggression. Together, these data suggest that VMHvI likely provides a substrate in which  
99 aggression plasticity can occur at multiple synaptic inputs, each of which may play distinct roles in  
100 physiology and/or behavior. Our results also reveal striking effects of aggression training on dendritic  
101 spine morphology among VMHvI<sup>Esr1</sup> neurons, although we cannot be certain whether the secondary  
102 dendritic branches where we observe this phenomenon receive synaptic input from AHiPM. Other recent  
103 studies have identified structural plasticity among VMHvI<sup>PR</sup>-derived axons innervating hypothalamic  
104 targets in females, which are mediated by changes in sex steroids during estrus (32). The present work,  
105 together with these other studies, begins to provide a view of the acute and dynamic changes that can  
106 occur through experience and/or hormonal modulation, in a brain node that controls innate social  
107 behaviors.

108

109

## 110 **Extended Materials and Methods**

111 **Animals.** All mice were housed in ventilated micro-isolator cages in a temperature-controlled  
112 environment (median temperature 23 °C), under a reversed 12h dark-light cycle, and had *ad libitum*  
113 access to food and water. Mouse cages were changed weekly on a fixed day on which experiments were  
114 not performed.

115 **Brain slice electrophysiology.** Acute mouse brain slices were prepared. Slices were cut on a vibratome  
116 (Leica VT1000S) to 300  $\mu\text{m}$  thickness and continuously perfused with oxygenated aCSF containing (in  
117 millimolar): NaCl (127), KCl (2.0),  $\text{NaH}_2\text{PO}_4$  (1.2),  $\text{NaHCO}_3$  (26),  $\text{MgCl}_2$  (1.3),  $\text{CaCl}_2$  (2.4), and D-glucose  
118 (10). See also *SI Appendix*, Table S1. Whole-cell current- and voltage-clamp recordings were performed  
119 with micropipettes filled with intracellular solution containing (in millimolar), K-gluconate (140), KCl (10),  
120 HEPES (10), EGTA (10), and  $\text{Na}_2\text{ATP}$  (2) or Cesium methanesulfonate (140), KCl (10), HEPES (10),  
121 EGTA (10), and  $\text{Na}_2\text{ATP}$  (2) (pH 7.3 with KOH). Recordings were performed using a Multiclamp 700B  
122 amplifier, a DigiData 1440 digitizer, and pClamp 11 software (Molecular Devices). Slow and fast  
123 capacitive components were semi-automatically compensated. Access resistance was monitored  
124 throughout the experiments, and neurons in which the series resistance exceeded 15  $\text{M}\Omega$  or changed  
125  $\geq 20\%$  were excluded from the statistics. The liquid junction potential was 9.7 mV and not compensated.  
126 The recorded current was sampled at 20 kHz. Baseline recordings of EPSCs, IPSCs and optogenetically-  
127 evoked synaptic currents were performed in normal aCSF conditions and in the absence of GABA and  
128 NMDA receptor blockers. Spontaneous excitatory currents were sampled at the reversal of  $\text{Cl}^-$  ( $V_{\text{HOLD}} = -$   
129 70 mV), and spontaneous inhibitory currents were sampled at the reversal of fast excitatory  
130 neurotransmission ( $V_{\text{HOLD}} = 0$  mV). All recordings were performed at near-physiological temperature  
131 ( $33 \pm 1^\circ\text{C}$ ). Reagents used in slice electrophysiology experiments; Neurobiotin<sup>TM</sup> tracer (Vector  
132 laboratories) was used in combination with Streptavidin conjugated to Alexa Fluor 647. MATLAB and  
133 OriginPro9 were used for electrophysiological data analysis. CNQX (10  $\mu\text{M}$ ), D-AP5 (25  $\mu\text{M}$ ), TTX (500  
134 nM), and 4-AP (100  $\mu\text{M}$ ) were bath applied to block excitatory transmission and to test if optogenetically  
135 evoked responses are monosynaptic (28). All drugs were pre-applied for 5 min in the slice chamber prior  
136 to data acquisition.

137 **Brain slice  $\text{Ca}^{2+}$  imaging.** The spontaneous activity of mouse  $\text{VMHvl}^{\text{Esr1}}$  neurons was monitored by  
138 imaging fluorescence changes of the jRCaMP7s biosensor, using a CCD camera (Evolve<sup>®</sup> 512,  
139 Photometrics), mounted on an Olympus BX51WI microscope. Recordings were 5 min in duration. As a

140 subpopulation of VMHvl<sup>Esr1</sup> neurons likely expresses T-type Ca<sup>2+</sup> channels, the Ca<sup>2+</sup> transients reported  
141 in Fig. 1 reflect both action potentials and subthreshold synaptic potentials. A 60x water-dipping objective  
142 was used to focus on VMHvl. Ca<sup>2+</sup> imaging analysis was performed using the MIN1PIPE one-photon  
143 based calcium imaging signal extraction pipeline (30), in combination with custom-written MATLAB  
144 routines.

145 **Cell filling and reconstruction.** Mouse *Esr1*<sup>+</sup> VMHvl neurons were recorded in whole-cell mode with  
146 intracellular pipette solution as above, with the addition of 0.2% neurobiotin. After recording, slices were  
147 placed in fixative (4% paraformaldehyde/0.16% picric acid), washed in PBS and incubated at 4°C for 72h  
148 in a solution containing streptavidin conjugated to Alexa Fluor 647. After extensive washing, slices were  
149 mounted with 2.5% DABCO in glycerol. VMHvl<sup>Esr1</sup> neuron identity of all filled cells was confirmed with  
150 colocalization studies of viral-induced tdTomato expression.

151 **Ex vivo optogenetics.** Photostimulation during slice whole-cell recordings was performed via a 3.4 watt  
152 535 nm LED mounted on the microscope fluorescence light source and delivered through the 60X  
153 objective's lens. Photostimulation was controlled via the analog outputs of a DigiData 1440A, enabling  
154 control over the duration and intensity. The photostimulation diameter through the objective lens was  
155 ~310 μm with illumination intensity typically scaled to 0.35 mW/mm<sup>2</sup>.

156 **In vivo optogenetics.** Subjects were coupled via a ferrule patch cord to a ferrule on the head of the  
157 mouse using a zirconia split sleeve (Doric Lenses). Ferrules and fiber-optic patch cords were purchased  
158 from Thorlabs and Doric Lenses, respectively. The optical fiber was connected to THORLABS fiber-  
159 coupled LED (M530F2, 9.6 mW) via a fiber-optic rotary joint (FRJ\_1x1\_FC-FC, Doric Lenses) to avoid  
160 twisting of the cable caused by the animal's movement. Prior to a testing session, following the coupling  
161 of the patch cords with the optic fiber ferrules, *Esr1*<sup>Cre/+</sup> animals were given 10 min to acclimate in their  
162 home cage in the absence of an intruder. The frequency and duration of photostimulation were controlled  
163 using the programmable train generator Pulse Pal (31). Light power was controlled by dialing an analog

164 knob on the LED driver (T-Cube™ LED Driver with Trigger Mode, Thorlabs, LEDD1B). Light power was  
165 measured from the tip of the ferrule in the patch cord at different laser output settings, using an optical  
166 power energy meter and a photodiode power sensor (Thorlabs, PM100D, and S130VC). Light power was  
167 dialed at 0.5 mW at the fiber tip. Upon identification of the fiber placement coordinates in brain tissue  
168 slides, irradiance (light intensity) was calculated using the brain tissue light transmission calculator based  
169 on (<http://www.stanford.edu/group/dlab/cgi-bin/graph/chart.php>) using laser power measured at the tip  
170 and the distance from the tip to the target brain region measured by histology. Animals showing no  
171 detectable viral expression in the target region and/or ectopic fiber placement were excluded from the  
172 analysis.

173 ***In vivo electrophysiology.*** *In vivo* electrophysiology recordings were performed in freely moving mice,  
174 using chronic silicon probe implants. All extracellular recordings were conducted in the left VMHvl, and  
175 all mice included in the present study were validated using the following criteria: identification of the  
176 lipophilic dye (DiD) tract targeting VMHvl, phototagging of VMHvl<sup>Esr1</sup> neurons, and photostimulation-  
177 evoked low-latency attack against a conspecific through optrode mediated VMHvl<sup>Esr1</sup> neuron  
178 photoactivation. Recordings were performed using an optrode based on the A1x32-Poly2-10mm-50s-  
179 177 NeuroNexus probe and a 100 µm optic fiber placed along the probe's shank terminating 50 µm above  
180 the probe's first recording sites. Photostimulation was delivered using fiber-coupled Thorlabs LEDs  
181 (M530F2, 9.6 mW for LTP/LTD studies, and M617F2, 13.2 mW for phototagging), and light power was  
182 dialed at 0.33 mW at the optrode's fiber tip. The probe was implanted 200 µm above the intended  
183 recording site, and using the NeuroNexus OH32LP oDrive was lowered over a period of four days to the  
184 target coordinates (lowering by 50 µm/day). Only channels that showed photo-responses in the local field  
185 potential were used for LFP analysis. Recordings were performed using the Open Ephys acquisition  
186 board with a sampling rate of 30 kHz, the Open Ephys I/O board, and the Open Ephys GUI (31). The  
187 LFP signal was obtained by applying low pass-filtering with a cut-off at 100 Hz on the raw voltage traces.  
188 Note that although the excitation wavelength for testing LTP *in vivo* was chosen to preferentially activate



189 AHiPM synaptic input to VMHvl neurons via Chronos, due to spectral overlap between the opsins we  
190 cannot exclude a contribution of direct ChrimsonR-mediated Esr1 neuron activation to the fEPSPs.

191 **Immunohistochemistry.** Mice were anesthetized with ketamine (KetaVed, VEDCO) and xylazine  
192 (AnaSed, NDC 59399-110-20), then transcardially perfused with 20 mL of ice-cold fixative. Whole brains  
193 were dissected, immersed in ice-cold fixative for 90 min then stored in 0.1M PBS (pH 7.4) containing  
194 20% sucrose, 0.02% bacitracin and 0.01% sodium azide for three days, before freezing with dry ice.  
195 Coronal sections were cut at a thickness of 14  $\mu\text{m}$  on a cryostat (Microm, Walldorf) and thaw-mounted  
196 onto gelatine-coated glass slides. For GFP staining, brain sections were incubated overnight at 4°C using  
197 a chicken anti-GFP antibody (Aves Labs, Inc., GFP-1010) at 1:500 dilution. For tdTomato staining brain  
198 sections were incubated overnight at 4°C using a rabbit anti-DsRed antibody (Takara, 632392) at 1:500  
199 dilution. Primary antibody incubation was followed by Alexa-488-conjugated goat anti-chicken secondary  
200 antisera (1:500; Invitrogen), and/or Alexa-568-conjugated donkey anti-rabbit secondary antisera (1:500;  
201 Invitrogen). DAPI solution (1mg/mL) was used at 1:10000 dilution. For further details on reagents, see  
202 also *SI Appendix*, Table S1.

203 **Confocal microscopy.** Brain slices were imaged by confocal microscopy (Zeiss, LSM 800). Brain areas  
204 were determined according to their anatomy using Paxinos and Franklin Brain Atlas (8, 33).

205 For cell reconstructions, each entire neurobiotin-filled neuron was acquired at 63X (NA = 1.4), 1  $\mu\text{m}$  step  
206 size using a Zeiss LSM880 confocal microscope. Imaris 9.3 (Bitplane) was used to visualize the topology  
207 of the dendritic tree and the centrifugal branch ordering method was chosen to sort dendrites, assigning  
208 order 1 to the root. 2<sup>nd</sup> order dendrites were then selected for further imaging acquisition to perform spine  
209 quantification. 70-90  $\mu\text{m}$ -long dendritic segments were acquired at 63X (NA = 1.43), 0.1  $\mu\text{m}$  step size  
210 and 0.06x0.06 pixel-size using Airy-scan detector at the LSM880. Two segments were acquired for  
211 dendrites longer than 200  $\mu\text{m}$ .

212 For spine quantification, images of dendritic segments were rendered in Imaris using the *Blend* algorithm  
213 and the *Filament* module was used to reconstruct dendrites and spines. Specifically, the auto-path  
214 method was chosen and thinnest spine diameter (between 1.5 and 2  $\mu\text{m}$ ), maximal distance from the  
215 dendrite (between 3 and 8  $\mu\text{m}$ ) and fluorescence intensity threshold were defined in every single dendrite  
216 to detect spines. The statistics module in Imaris was used to extract spine density values. Three to six  
217 segments per neuron were quantified and values were averaged.

218 **Tail-tip whole blood sampling.** Whole blood samples of 40-70  $\mu\text{L}$  were collected from the lateral tail  
219 vein of restrained mice (32). Only blood samples acquired within 2 min post-restraining were used for  
220 hormone measurements, and the subjects were then returned to their home cage. Briefly, the rodent's  
221 tail was immersed for 30 sec in 40°C water to dilate the tail blood vessels. Immediately after, a 23G  
222 needle was used to puncture the lateral tail vein, and whole blood was collected. Bleeding was stopped  
223 via applying gentle pressure to the tail at the level of the puncture with surgical cleaning tissue, and 2%  
224 chlorhexidine antiseptic solution was used for tail disinfection at the end of the procedure. Blood samples  
225 were refrigerated at 4°C for 30 min and then centrifuged at 4°C at 2000 RCF. Following centrifugation,  
226 serum was collected and was frozen at -80°C for a maximal period of 2 months prior to performing ELISA  
227 measurements. All blood samples were acquired during the dark phase of the 12h/12h light/dark cycle.  
228 For further details on reagents, see also *SI Appendix*, Table S1.

229 **Testosterone ELISA.** 96-well plates were used in a ready-to-use kit for testosterone ELISA (R&D  
230 systems – Catalog number KGE010). Linear regression was used to fit the optical densities for the  
231 standard curve vs the concentration. The standard curve range for corticosterone was 300 to 100000  
232 pg/mL. Concentrations were calculated from the optical density at 450 nm of each sample. Appropriate  
233 sample dilutions were carried out to maintain detection in the linear part of the standard curve and  
234 typically involved 1 to 10 for mouse serum samples. Data acquired from the performed ELISAs are  
235 presented as absolute values. Differences between groups were identified by Student's *t*-test or ANOVA.

236 **Viral vectors.** For *ex vivo* Ca<sup>2+</sup> imaging studies of VMHvl neurons, *Esr1Cre*<sup>+/+</sup> male mice were injected  
237 in VMHvl with 200 nL of AAV9-Syn-FLEX-jGCaMP7s-WPRE (addgene 104491-AAV9)  $5.3 \times 10^{12}$   
238 genomic copies per mL. For *ex vivo* optogenetic studies, *Esr1Cre*<sup>+/+</sup> male mice were injected in VMHvl  
239 with 200 nL of AAV9-FLEX-tdTomato (addgene 28306-AAV9)  $4.2 \times 10^{12}$  genomic copies per mL and in  
240 AHiPM with 100 nL of AAV5-Syn-Chronos-GFP (addgene 59170-AAV5)  $3.7 \times 10^{12}$  genomic copies per  
241 mL. For *in vivo* optogenetic and electrophysiology experiments, *Esr1Cre*<sup>+/+</sup> male mice were injected in  
242 VMHvl with 100 nL of AAV5-Syn-FLEX-rc[ChrimsonR-tdTomato] (addgene 62723-AAV5)  $4.1 \times 10^{12}$   
243 genomic copies per mL and in AHiPM with 100 nL of AAV5-Syn-Chronos-GFP (addgene 59170-AAV5)  
244  $3.7 \times 10^{12}$  genomic copies per mL. Control groups were injected in VMHvl with 100 nL of AAV9-FLEX-  
245 tdTomato (addgene 28306-AAV9)  $4.2 \times 10^{12}$  genomic copies per mL and in AHiPM with 100 nL of AAV5-  
246 CAG-GFP (37825-AAV5)  $5.9 \times 10^{12}$  genomic copies per mL. For further details on reagents, see also *SI*  
247 *Appendix*, Table S1.

248 **Stereotactic surgery and viral gene transfer.** Adult heterozygous *Esr1Cre*<sup>+/+</sup> males were single-housed  
249 for at least five days before undergoing surgical procedures and were operated on at 16–20 weeks of  
250 age. Mice were anesthetized using isoflurane (5% induction, 1–2% maintenance, in 95% oxygen) and  
251 placed in a stereotaxic frame (David Kopf Instruments). Body temperature was maintained using a  
252 heating pad. An incision was made to expose the skull for stereotaxic alignment using the inferior cerebral  
253 vein and the Bregma as vertical references. We based the coordinates for the craniotomy and stereotaxic  
254 injection of VMHvl on an anatomical magnetic resonance atlas of the mouse brain (AP: –4.68 mm; ML:  
255  $\pm 0.78$  mm; DV: –5.80 mm), as previously described (34). Virus suspension was injected using a pulled-  
256 glass capillary at a slow rate of 8–10 nL/min, 100 nl per injection site (Nanojector II, Drummond Scientific;  
257 Micro4 controller, World Precision Instruments). The glass capillary was withdrawn 10 min after the  
258 cessation of injection.

259 **Osmotic mini-pumps.** Testosterone was dissolved at 30 mg/ml in sesame oil and was administered for  
260 2 weeks at a rate of 0.75 mg/hour via subcutaneous osmotic mini-pumps (Alzet, model 1002) (35). For  
261 further details on reagents, see also *SI Appendix*, Table S1.

262 **Social behavior assays.** The aggression phenotype of animals defined as aggressive (AGG), or non-  
263 aggressive (NON) in the present study was based on the expression of aggressive behavior in the five  
264 consecutive day resident-intruder test (5cdRI). Animals that did not express any aggressive behavior in  
265 the 5cdRI were identified as NONs, while all AGGs expressed aggression in a minimum of three out of  
266 the five trials, with the majority expressing attack behavior in all five days. As described in Fig. 1, the  
267 5cdRI composed of a 15 min social interaction test per day in the resident's home arena, with socially  
268 naïve 4-5 month-old residents. Intruders were BALB/c males 2-3 months old and of lower weight/size.  
269 Three follow up tests were performed in the 5cdRI experimental design presented in Fig. 1, specifically,  
270 2 weeks, 4 weeks and 12 weeks following the completion date of the 5cdRI assay. Note that only 15 out  
271 of a total of 106 aggressive mice, were used to quantify the effect of aggression training. This was based  
272 on the finding that following behavioral analysis of the first 15 mice used in the study, the power of the  
273 ANOVA test reached  $P < 0.0001$ . This suggested that including additional observations would not aid the  
274 power of the statistical test. In Fig. 5, following the 5cdRI, on day six a social interaction test was  
275 performed in a novel home-cage-sized arena. In addition to the C57 male, a male with a larger  
276 bodyweight/size CD-1 conspecific was introduced. The duration of this experiment was 15 min, following  
277 which both animals were returned to their home cage.

278 **Statistics.** No statistical methods were used to predetermine sample sizes but our sample sizes are  
279 similar to those reported in previous publications (36). Data met the assumptions of the statistical tests  
280 used and were tested for normality and variance. Normality was determined by D'Agostino–Pearson  
281 normality test. All *t*-tests and one-way ANOVAs were performed using GraphPad Prism software  
282 (Graphpad Software Inc.). Statistical significance was set at  $P < 0.05$ .

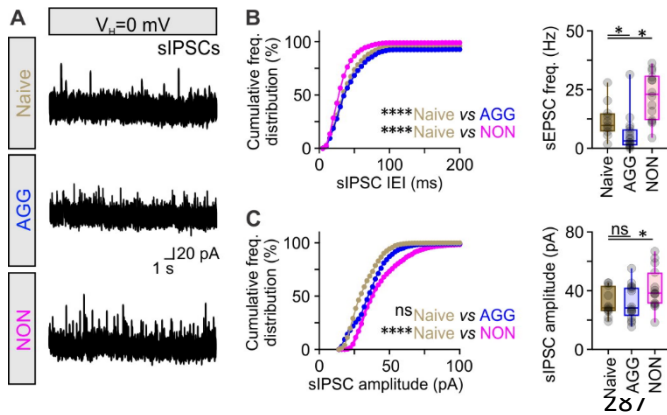

288 **Fig. S1. Presynaptic plasticity of inhibitory input in VMHvl<sup>Esr1</sup> neurons of non-aggressive male**  
 289 **mice.**

290 (A) Representative recordings of spontaneous inhibitory post-synaptic currents (sIPSCs) from VMHvl<sup>Esr1</sup>  
 291 neurons, from socially naive, aggressive (AGG) and non-aggressive (NON) mice.

292 (B) Left – cumulative frequency distribution plot of sIPSC inter-event interval (IEI) in voltage-clamp  
 293 recordings collected from VMHvl<sup>Esr1</sup> neurons from socially naive, AGG and NON mice (n=11-14 VMHvl<sup>Esr1</sup>  
 294 neuron recording per group, collected from 8-10 mice per group, Kolmogorov-Smirnov test,  $P < 0.0001$   
 295 between socially naive and AGG mice,  $P < 0.0001$  between socially naive and NON mice). Right –  
 296 comparison of sIPSC frequency in voltage-clamp recordings collected from VMHvl<sup>Esr1</sup> neurons from  
 297 socially naive, AGG and NON mice (n=11-14 VMHvl<sup>Esr1</sup> neuron recording per group, collected from 8-10  
 298 mice per group, Kruskal-Wallis one-way ANOVA with uncorrected Dunn's post hoc test,  $P = 0.0425$   
 299 between socially naive and AGG mice,  $P = 0.0480$  between socially naive and NON mice).

300 (C) Left – cumulative frequency distribution plot of sIPSC amplitude in voltage-clamp recordings  
 301 collected from VMHvl<sup>Esr1</sup> neurons from socially naive, AGG and NON mice (n=11-14 VMHvl<sup>Esr1</sup> neuron  
 302 recording per group, collected from 8-10 mice per group, Kolmogorov-Smirnov test,  $P = 0.2780$  between  
 303 socially naive and AGG mice,  $P < 0.0001$  between socially naive and NON mice). Right – comparison of  
 304 sIPSC amplitude in voltage-clamp recordings collected from VMHvl<sup>Esr1</sup> neurons from socially naive, AGG

305 and NON mice (n=11-14 VMHv<sup>Esr1</sup> neuron recording per group, collected from 8-10 mice per group,  
306 Kruskal-Wallis one-way ANOVA with uncorrected Dunn's post hoc test,  $P = 0.8995$  between socially  
307 naive and AGG mice,  $P = 0.0476$  between socially naive and NON mice).

308 ns; not significant,  $*P < 0.05$ ,  $****P < 0.0001$ . In box plots the median is represented by the center line,  
309 the interquartile range is represented by the box edges, the bottom whisker extends to minimal value,  
310 and the top whisker extends to the maximal value.

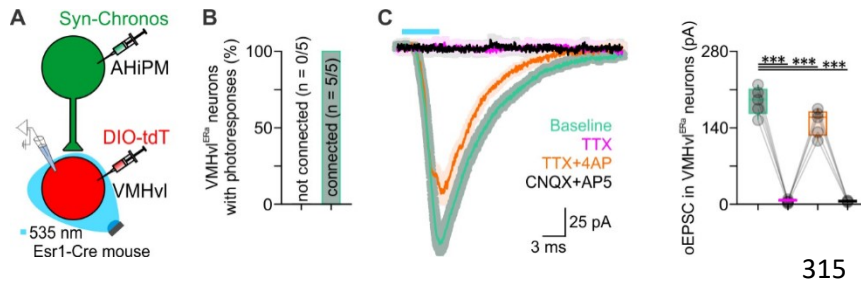

316 **Fig. S2. Monosynaptic connectivity between AHiPM and VMHv1<sup>Esr1</sup> neurons.**

317 (A) Schematic illustration of the experimental design, transducing AHiPM neurons with Chronos and  
 318 optically evoking postsynaptic responses in VMHv1<sup>Esr1</sup> neurons *ex vivo*.

319 (B) Quantification of VMHv1<sup>Esr1</sup> neurons with optically-evoked EPSCs (oEPSCs).

320 (C) Averaged amplitudes of oEPSCs evoked on baseline (green), TTX (magenta), TTX + 4AP (orange),  
 321 and in CNQX and AP5 (black); n=5 brain slices, collected from n=5 mice, one-way ANOVA with Dunnett's  
 322 post hoc test,  $P = 0.0002$  between baseline and TTX conditions,  $P = 0.0001$  between baseline and  
 323 TTX+4AP conditions,  $P = 0.0002$  between baseline and CNQX+AP5 conditions. Shaded region  
 324 represents the standard error. The vertical scale bar defines current and the horizontal scale bar time.

325 \*\*\* $P < 0.001$ . In box plots the median is represented by the center line, the interquartile range is  
 326 represented by the box edges, the bottom whisker extends to minimal value, and the top whisker extends  
 327 to the maximal value.

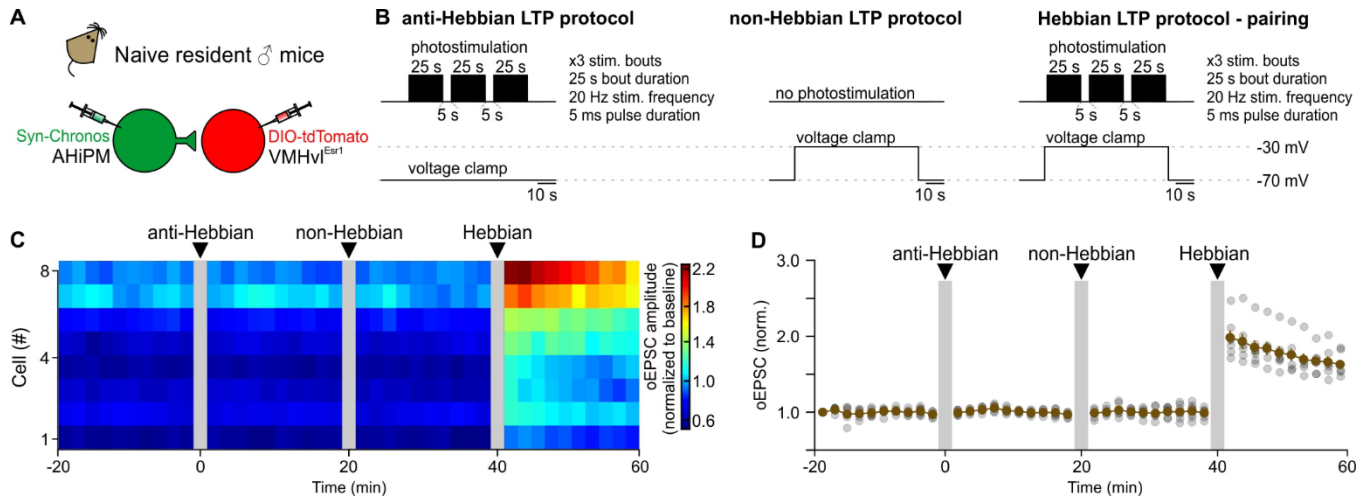

328

329 **Fig. S3. Characterization of LTP-inducing stimulation protocols at the AHiPM→VMHvl<sup>Esr1</sup> synapse.**

330 (A) Schematic of the experimental design used to identify the appropriate stimulation protocol for LTP  
 331 induction *ex vivo* in socially naïve mice.

332 (B) Illustration of the experimental protocols tested to to induce LTP in the AHiPM→VMHvl synapse.

333 (C) Monitoring the optically induced EPSC (oEPSC) prior to, and following application of each of three  
 334 stimulation protocols (n=8 cells, n=5 socially naïve mice).

335 (D) Alternative quantification/illustration of optically induced EPSC (oEPSC) prior to, and following  
 336 application of each of three stimulation protocols (n=8 cells, n=5 socially naïve mice – similar to panel C).

337



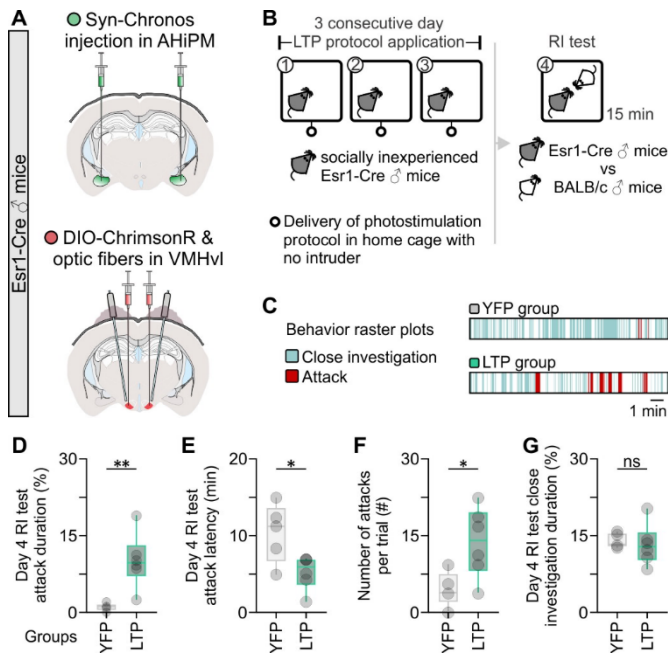

345

346 **Fig. S4. Optogenetic induction of LTP at AHiPM→VMHvl<sup>Esr1</sup> synapses in socially naïve mice leads**  
 347 **to elevated aggression in the first resident-intruder test.**

348 (A) Schematic indicative of the experimental design used to induced hypothalamic LTP in the  
 349 AHiPM→VMHvl synapses, via Chronos-eYFP expression in AHiPM, and ChrimsonR expression in  
 350 VMHvl<sup>Esr1</sup> neurons.

351 (B) Schematic of the behavior test design used to identify whether induction of LTP in the AHiPM→VMHvl  
 352 synapses, influences the innate expression of aggression.

353 (C) Representative behavior raster plots of a control (YFP) and opsin-expressing (LTP) mouse, in the  
 354 resident-intruder test against a novel BALBc conspecific.

355 (D) Quantification of attack duration (n=5-6 mice per group, two-tailed unpaired *t*-test, *P* = 0.0046 between  
 356 YFP and LTP groups).

357 (E) Quantification of attack latency (n=5-6 mice per group, two-tailed unpaired *t*-test, *P* = 0.0214 between  
358 YFP and LTP groups).

359 (F) Quantification of number of attacks per trial (n=5-6 mice per group, two-tailed unpaired *t*-test, *P* =  
360 0.0235 between YFP and LTP groups).

361 (G) Quantification of close investigation duration (n=5-6 mice per group, two-tailed unpaired *t*-test, *P* =  
362 0.7106 between YFP and LTP groups).

363 \**P* < 0.05, \*\**P* < 0.01. In box plots the median is represented by the center line, the interquartile range is  
364 represented by the box edges, the bottom whisker extends to minimal value, and the top whisker extends  
365 to the maximal value.

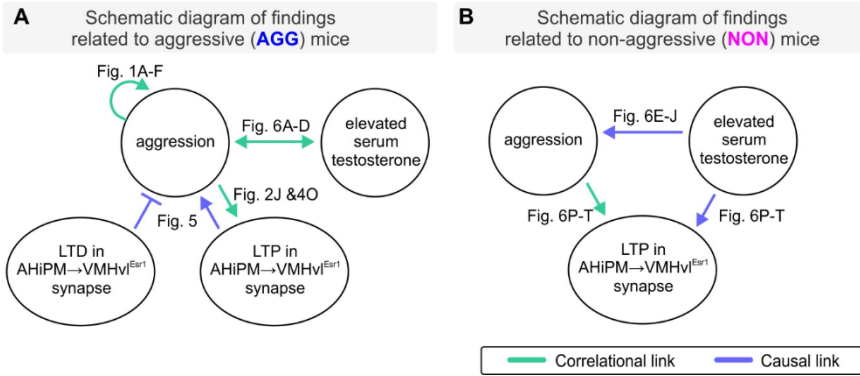

371

372 **Fig. S5. Schematic summary.**

373 (A) The schematic summarizes the findings from AGG mice, and the suggested links between  
 374 aggression, serum testosterone and hypothalamic LTP.

375 (B) Similar to panel (A), but summarizing results from experiments in NON mice - this schematic  
 376 summarizes the identified links among aggression, serum testosterone and hypothalamic LTP. Our  
 377 results do not distinguish whether the effect of elevated serum testosterone to increase LTP *in vivo* (Fig.  
 378 6P-T) is direct, or rather indirect via an effect to increase aggressive behavior, which in turn enhances  
 379 LTP. However, exogenous administration of T to NON mice (in the absence of any aggressive  
 380 experience) enhances LTP amplitude and persistence as tested *ex vivo* (Fig. 6K-O).

381 **Materials and Methods**382 **Table S1. Reagents and resources.**

| REAGENT or RESOURCE                                  | SOURCE              | IDENTIFIER    |
|------------------------------------------------------|---------------------|---------------|
| <b>Antibodies</b>                                    |                     |               |
| Rabbit monoclonal anti-DsRed                         | Takara              | 632392        |
| Anti-GFP rabbit serum                                | Invitrogen          | A-6455        |
| Chicken polyclonal anti-GFP                          | Aves Labs, Inc.     | GFP-1010      |
| Donkey anti-Mouse IgG- Alexa Fluor 488               | ThermoFisher        | A-21202       |
| Donkey anti-Rabbit IgG- Alexa Fluor 488              | ThermoFisher        | A-21206       |
| Donkey anti-Rabbit IgG- Alexa Fluor 568              | ThermoFisher        | A-10042       |
| Donkey anti-Rabbit IgG- Alexa Fluor 647              | ThermoFisher        | A-31573       |
| Goat anti-Chicken IgY- Alexa Fluor 488               | ThermoFisher        | A-11039       |
| Biotinylated Goat Anti-Rabbit IgG Antibody           | Vector Laboratories | BA-1000       |
| Donkey anti-Rabbit IgG- Alexa Fluor 568              | ThermoFisher        | A-10042       |
| <b>Chemicals, Peptides, and Recombinant Proteins</b> |                     |               |
| Picric acid                                          | Sigma-Aldrich       | P6744         |
| 4% paraformaldehyde (PFA) in PBS                     | Santa Cruz Biotech. | CAS30525-89-4 |
| Streptavidin conjugated to Alexa Fluor 647           | ThermoFisher        | CS32357       |
| Neurobiotin tracer                                   | VectorLabs          | SP-1120-50    |
| Sodium chloride                                      | Sigma-Aldrich       | S9888         |
| Sodium bicarbonate                                   | Sigma-Aldrich       | S6297         |
| D-(+)-Glucose                                        | Sigma-Aldrich       | G7528         |
| Sodium phosphate monobasic dihydrate                 | Sigma-Aldrich       | 71505         |
| Potassium chloride                                   | Sigma-Aldrich       | P9333         |
| Magnesium sulfate heptahydrate                       | Sigma-Aldrich       | 63138         |
| Calcium chloride dihydrate                           | Sigma-Aldrich       | C5080         |
| 4-Aminopyridine                                      | Sigma-Aldrich       | 275875        |
| CNQX disodium salt                                   | TOCRIS              | 1045          |
| D-AP5                                                | TOCRIS              | 0106          |

|                                                       |                     |                                                                                   |
|-------------------------------------------------------|---------------------|-----------------------------------------------------------------------------------|
| Tetrodotoxin citrate                                  | Alomone labs        | T-550                                                                             |
| DAPI solution (1mg/mL)                                | ThermoFisher        | 62248                                                                             |
| OCT Cryomount                                         | Histolab            | 45830                                                                             |
| Normal donkey serum (NDS)                             | Sigma-Aldrich       | D9663                                                                             |
| Bovine Serum Albumin (BSA)                            | Sigma-Aldrich       | A2153                                                                             |
| Triton X-100                                          | Sigma-Aldrich       | T8787                                                                             |
| Sucrose                                               | Sigma-Aldrich       | S7903                                                                             |
| DiD' solid                                            | Invitrogen          | D7757                                                                             |
| Vectastain ABC kit                                    | Vector Laboratories | PK-6100                                                                           |
| 3,3-Diaminobenzidine tetrahydrochloride hydrate (DAB) | Sigma-Aldrich       | D5637                                                                             |
| Testosterone                                          | Sigma-Aldrich       | T1500                                                                             |
| Sesame oil                                            | Sigma-Aldrich       | S3547-250ML                                                                       |
| Phosphate buffer saline (PBS)                         | Santa Cruz Biotech. | SC-24946                                                                          |
| <b>ELISA kit</b>                                      |                     |                                                                                   |
| Testosterone Parameter Assay Kit                      | R&D systems         | KGE010                                                                            |
| <b>Experimental Models: Organisms/Strains</b>         |                     |                                                                                   |
| <i>Esr1<sup>Cre/+</sup></i>                           | Lee et al., 2014    | Own breeding                                                                      |
| BALB/cAnNCr mouse line                                | Charles River       | <a href="https://www.criver.com/">https://www.criver.com/</a>                     |
| CrI:CD1(ICR)                                          | Charles River       | <a href="https://www.criver.com/">https://www.criver.com/</a>                     |
| <b>AAV mediated gene transfer</b>                     |                     |                                                                                   |
| AAV5-CAG-GFP                                          | addgene             | 37825-AAV5                                                                        |
| AAV9-FLEX-tdTomato                                    | addgene             | 28306-AAV9                                                                        |
| AAV5-Syn-Chronos-GFP                                  | addgene             | 59170-AAV5                                                                        |
| AAV5-Syn-FLEX-rc[ChrimsonR-tdTomato]                  | addgene             | 62723-AAV5                                                                        |
| AAV9-Syn-FLEX-jGCaMP7s-WPRE                           | addgene             | 104491-AAV9                                                                       |
| <b>Software</b>                                       |                     |                                                                                   |
| Clampfit 11                                           | MOLECULAR DEVICES   | <a href="https://www.moleculardevices.com/">https://www.moleculardevices.com/</a> |
| MATLAB 2018                                           | MathWorks           | <a href="https://www.mathworks.com/">https://www.mathworks.com/</a>               |

|                     |                             |                                                                                                                       |
|---------------------|-----------------------------|-----------------------------------------------------------------------------------------------------------------------|
| OriginPro 9         | OriginLab                   | <a href="https://www.originlab.com/">https://www.originlab.com/</a>                                                   |
| ImageJ              | NIH; Schneider et al., 2012 | <a href="https://imagej.nih.gov/ij/">https://imagej.nih.gov/ij/</a>                                                   |
| Prism 8             | GraphPad                    | <a href="https://www.graphpad.com/scientific-software/prism/">https://www.graphpad.com/scientific-software/prism/</a> |
| Illustrator CC 2020 | Adobe Systems               | <a href="http://www.adobe.com">http://www.adobe.com</a>                                                               |
| CorelDrawX8         | CorelDRAW graphics suite    | <a href="https://www.coreldraw.com/">https://www.coreldraw.com/</a>                                                   |
| Photoshop 2020      | Adobe Systems               | <a href="http://www.adobe.com">http://www.adobe.com</a>                                                               |

383

384 **References for extended discussion and extended materials and methods**

- 385 1. J. A. Kauer, R. C. Malenka, Synaptic plasticity and addiction. *Nature reviews. Neuroscience* **8**, 844-858  
386 (2007).
- 387 2. D. Saal, Y. Dong, A. Bonci, R. C. Malenka, Drugs of abuse and stress trigger a common synaptic adaptation  
388 in dopamine neurons. *Neuron* **37**, 577-582 (2003).
- 389 3. M. A. Ungless, J. L. Whistler, R. C. Malenka, A. Bonci, Single cocaine exposure in vivo induces long-term  
390 potentiation in dopamine neurons. *Nature* **411**, 583-587 (2001).
- 391 4. B. Pradier *et al.*, Persistent but Labile Synaptic Plasticity at Excitatory Synapses. *The Journal of*  
392 *neuroscience : the official journal of the Society for Neuroscience* **38**, 5750-5758 (2018).
- 393 5. K. Koga *et al.*, Impaired presynaptic long-term potentiation in the anterior cingulate cortex of Fmr1 knock-  
394 out mice. *The Journal of neuroscience : the official journal of the Society for Neuroscience* **35**, 2033-2043  
395 (2015).
- 396 6. C. A. Barnes *et al.*, LTP saturation and spatial learning disruption: effects of task variables and saturation  
397 levels. *The Journal of neuroscience : the official journal of the Society for Neuroscience* **14**, 5793-5806  
398 (1994).
- 399 7. B. W. Schroeder, P. Shinnick-Gallagher, Fear learning induces persistent facilitation of amygdala synaptic  
400 transmission. *The European journal of neuroscience* **22**, 1775-1783 (2005).
- 401 8. R. Remedios *et al.*, Social behaviour shapes hypothalamic neural ensemble representations of conspecific  
402 sex. *Nature* **550**, 388-392 (2017).
- 403 9. Y. Li *et al.*, Neuronal Representation of Social Information in the Medial Amygdala of Awake Behaving  
404 Mice. *Cell* **171**, 1176-1190 e1117 (2017).
- 405 10. K. Keleman *et al.* (2012) Dopamine neurons modulate pheromone responses in Drosophila courtship  
406 learning. in *Nature* (Nature Publishing Group), pp 145-149.
- 407 11. X. Zhao, D. Lenek, U. Dag, B. J. Dickson, K. Keleman (2018) Persistent activity in a recurrent circuit underlies  
408 courtship memory in Drosophila. in *Elife* (eLife Sciences Publications Limited).
- 409 12. L. C. Griffith, A. Ejima, Courtship learning in Drosophila melanogaster: diverse plasticity of a reproductive  
410 behavior. *Learn Mem* **16**, 743-750 (2009).
- 411 13. M. P. Donley, J. B. Rosen, Novelty and fear conditioning induced gene expression in high and low states of  
412 anxiety. *Learning & memory* **24**, 449-461 (2017).
- 413 14. R. C. Twining, J. E. Vantrease, S. Love, M. Padival, J. A. Rosenkranz, An intra-amygdala circuit specifically  
414 regulates social fear learning. *Nature neuroscience* **20**, 459-469 (2017).
- 415 15. C. T. Gross, N. S. Canteras, The many paths to fear. *Nature reviews. Neuroscience* **13**, 651-658 (2012).
- 416 16. E. W. Fish, J. F. De Bold, K. A. Miczek, Aggressive behavior as a reinforcer in mice: activation by  
417 allopregnanolone. *Psychopharmacology* **163**, 459-466 (2002).
- 418 17. A. L. Falkner, L. Grosenick, T. J. Davidson, K. Deisseroth, D. Lin, Hypothalamic control of male aggression-  
419 seeking behavior. *Nature neuroscience* **19**, 596-604 (2016).
- 420 18. S. A. Golden *et al.*, Nucleus Accumbens Drd1-Expressing Neurons Control Aggression Self-Administration  
421 and Aggression Seeking in Mice. *The Journal of neuroscience : the official journal of the Society for*  
422 *Neuroscience* **39**, 2482-2496 (2019).
- 423 19. K. L. Gobrogge, Y. Liu, X. Jia, Z. Wang, Anterior hypothalamic neural activation and neurochemical  
424 associations with aggression in pair-bonded male prairie voles. *THE JOURNAL OF COMPARATIVE*  
425 *NEUROLOGY* **502**, 1109-1122 (2007).
- 426 20. M. Zelikowsky *et al.*, The Neuropeptide Tac2 Controls a Distributed Brain State Induced by Chronic Social  
427 Isolation Stress. *Cell* **173**, 1265-1279 e1219 (2018).
- 428 21. D. W. Kim *et al.*, Multimodal Analysis of Cell Types in a Hypothalamic Node Controlling Social Behavior.  
429 *Cell* **179**, 713-728 e717 (2019).

- 430 22. E. J. Hermans, N. F. Ramsey, J. van Honk, Exogenous testosterone enhances responsiveness to social threat  
431 in the neural circuitry of social aggression in humans. *Biological psychiatry* **63**, 263-270 (2008).
- 432 23. K. K. Soma, Testosterone and aggression: Berthold, birds and beyond. *Journal of neuroendocrinology* **18**,  
433 543-551 (2006).
- 434 24. J. M. Hume, K. E. Wynne-Edwards, Castration reduces male testosterone, estradiol, and territorial  
435 aggression, but not paternal behavior in biparental dwarf hamsters (*Phodopus campbelli*). *Hormones and*  
436 *behavior* **48**, 303-310 (2005).
- 437 25. D. J. Albert, R. H. Jonik, N. V. Watson, B. B. Gorzalka, M. L. Walsh, Hormone-dependent aggression in male  
438 rats is proportional to serum testosterone concentration but sexual behavior is not. *Physiology & behavior*  
439 **48**, 409-416 (1990).
- 440 26. D. J. Albert, E. M. Dyson, M. L. Walsh, Intermale social aggression: reinstatement in castrated rats by  
441 implants of testosterone propionate in the medial hypothalamus. *Physiology & behavior* **39**, 555-560  
442 (1987).
- 443 27. H. D. Steklis, G. L. Brammer, M. J. Raleigh, M. T. McGuire, Serum testosterone, male dominance, and  
444 aggression in captive groups of vervet monkeys (*Cercopithecus aethiops sabaeus*). *Hormones and*  
445 *behavior* **19**, 154-163 (1985).
- 446 28. X. Zha *et al.*, VMHvl-Projecting Vglut1+ Neurons in the Posterior Amygdala Gate Territorial Aggression.  
447 *Cell reports* **31** (2020).
- 448 29. T. Yamaguchi *et al.*, Posterior amygdala regulates sexual and aggressive behaviors in male mice. *Nature*  
449 *neuroscience* 10.1038/s41593-020-0675-x (2020).
- 450 30. L. Lo *et al.*, Connectional architecture of a mouse hypothalamic circuit node controlling social behavior.  
451 *Proceedings of the National Academy of Sciences of the United States of America* **116**, 7503-7512 (2019).
- 452 31. J. Nordman *et al.*, Potentiation of divergent medial amygdala pathways drives experience-dependent  
453 aggression escalation. *The Journal of neuroscience : the official journal of the Society for Neuroscience*  
454 10.1523/JNEUROSCI.0370-20.2020 (2020).
- 455 32. S. Inoue *et al.*, Periodic Remodeling in a Neural Circuit Governs Timing of Female Sexual Behavior. *Cell*  
456 **179**, 1393-+ (2019).
- 457 33. H. Lee *et al.*, Scalable control of mounting and attack by Esr1+ neurons in the ventromedial hypothalamus.  
458 *Nature* **509**, 627-632 (2014).
- 459 34. L. Petreanu, T. Mao, S. M. Sternson, K. Svoboda, The subcellular organization of neocortical excitatory  
460 connections. *Nature* **457**, 1142-1145 (2009).
- 461 35. J. Lu *et al.*, MIN1PIPE: A Miniscope 1-Photon-Based Calcium Imaging Signal Extraction Pipeline. *Cell reports*  
462 **23**, 3673-3684 (2018).
- 463 36. J. I. Sanders, A. Kepecs, A low-cost programmable pulse generator for physiology and behavior. *Frontiers*  
464 *in neuroengineering* **7**, 43 (2014).
